# Supplementary material for: Diversity, dynamics, direction, and magnitude of high-altitude migrating insects in the Sahel
Source: PubMed Central journal article supplement (PMC7688652; doi:10.1038/s41598-020-77196-7), 2020-11-25
Supplement: 41598_2020_77196_MOESM1_ESM.pdf [file 41598_2020_77196_MOESM1_ESM.pdf]

## Supplementary Materials:

### Diversity, dynamics, direction, and magnitude of high-altitude migrating insects in the Sahel

Jenna Florio<sup>a</sup>, Laura M. Verú<sup>a</sup>, Adama Dao<sup>b</sup>, Alpha S. Yaro<sup>b</sup>, Moussa Diallo<sup>b</sup>, Zana L. Sanogo<sup>b</sup>, Djibril Samaké<sup>b</sup>, Diana L. Huestis<sup>a</sup>, Ousman Yossi<sup>b</sup>, Elijah Talamas<sup>c,d</sup>, M. Lourdes Chamorro<sup>c</sup>, J. Howard Frank<sup>e</sup>, Maurizio Biondi<sup>f</sup>, Carsten Morkel<sup>g</sup>, Charles Bartlett<sup>h</sup>, Yvonne-Marie Linton<sup>j</sup>, Ehud Strobach<sup>i</sup>, Jason W. Chapman<sup>k</sup>, Don R. Reynolds<sup>l</sup>, Roy Faiman<sup>a</sup>, Benjamin J. Krajacich<sup>a</sup>, Corey S. Smith<sup>m</sup> and Tovi Lehmann<sup>\*a</sup>

<sup>a</sup> Laboratory of Malaria and Vector Research, NIAID, NIH. Rockville, MD, USA

<sup>b</sup> Malaria Research and Training Center (MRTC) / Faculty of Medicine, Pharmacy and Odonto-stomatology, Bamako, Mali

<sup>c</sup> Systematic Entomology Laboratory - ARS, USDA c/o Smithsonian Institution, National Museum of Natural History, Washington, DC, USA

<sup>d</sup> Florida Department of Agriculture and Consumer Services, Division of Plant Industry, Gainesville, FL, USA

<sup>e</sup> Entomology and Nematology Department, University of Florida, Gainesville, FL, USA

<sup>f</sup> Department of Life, Health, and Environmental Sciences, University of L'Aquila, Italy

<sup>g</sup> Institute of Applied Entomology, Beverungen, Germany

<sup>h</sup> Department of Entomology and Wildlife Ecology, University of Delaware, Newark DE, USA

<sup>i</sup> Earth System Science Interdisciplinary Center, University of Maryland, College Park, MD, USA

<sup>j</sup> Walter Reed Biosystematics Unit, Smithsonian Institution Museum Support Center, Suitland, MD, USA and Department of Entomology, Smithsonian Institution, National Museum of Natural History, Washington, DC, USA

<sup>k</sup> Centre for Ecology and Conservation, and Environment and Sustainability Inst., University of Exeter, Penryn, Cornwall, UK and College of Plant Protection, Nanjing Agricultural University, Nanjing, P. R. China

<sup>l</sup> Natural Resources Institute, University of Greenwich, Chatham, Kent, ME4 4TB, UK, and Rothamsted Research, Harpenden, Hertfordshire AL5 2JQ, UK

<sup>m</sup> American Museum of Natural History, New York, NY, USA

\* Corresponding author's email address: [tlehmann@niaid.nih.gov](mailto:tlehmann@niaid.nih.gov)

The Supplementary Materials include: Figures S1-S5, Tables S1 (List of identified insects from the project) and S2 (selected taxa: taxonomy and natural history).

Figure S1. Plates 1-15. 1: *Dysdercus* sp. (Pyrrhocoridae), 2: *Cysteochila endeca* Drake (Tingidae), 3: *Metacanthus nitidus* Štusák (Berytidae), 4-6: *Nephotettix modulatus* Melichar (Cicadellidae), 7: *Anopheles coluzzii* Coetzee & Wilkerson (male, Culicidae), 8: *Paederus sabaes* Erichson, 9: *Paederus fuscipes* Curtis (Staphylinidae), 10: *Zolotarevskyella rhytidera* (Chaudoir) (Carabidae), 11: *Chaetocnema coletta* Bechyn (Chrysomelidae), 12: *Hydrovatus* sp. (Dytiscidae), 13: *Berosus* sp. (Hydrophilidae), 14: *Microchelonus* sp. (Braconidae), 15: *Hypotrigona* sp. (Apidae). Ruler units are mm.

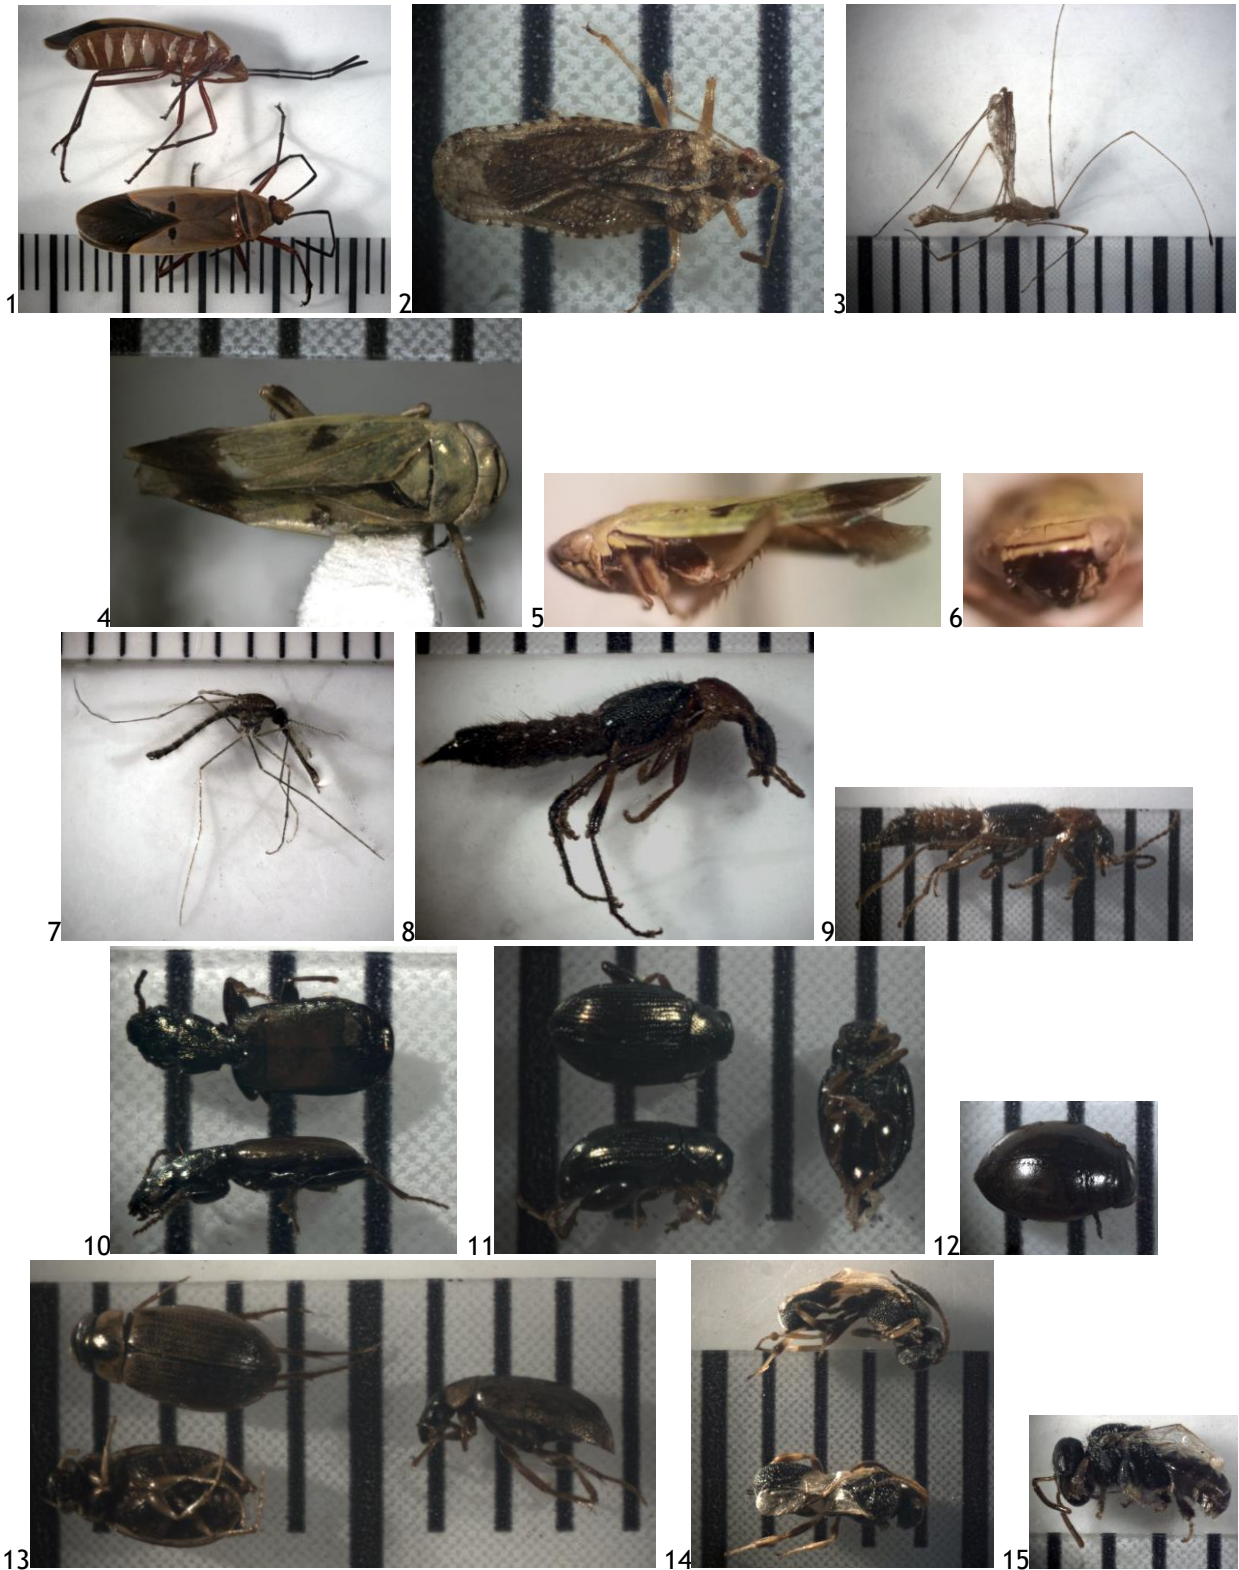

Plates 1-15. Selected species pictured with ruler; lines are 1mm. apart 1: *Dysdercus* sp., 2: *Cy. endeca*, 3: *M. nitidus*, 4-6: *N. modulatus*, 7: *A. coluzzii* (male), 8: *P. sabeus*, 9: *P. fuscipes*, 10: *Z. rhytidera*, 11: *Ch. coletta*, 12: *Hydrovatus* sp., 13: *Berosus* sp., 14: *Microchelonus* sp., 15: *Hypotrigona* sp.

Figure S2. L-shape distributions of the number of insects per panel (histogram) and kernel density function (line) for the selected taxa. Maximum value of the X-axis was truncated to 15 (some values were higher, see Max value, inset). N and Max denote the total and the maximum density/panel in 220 sticky nets.

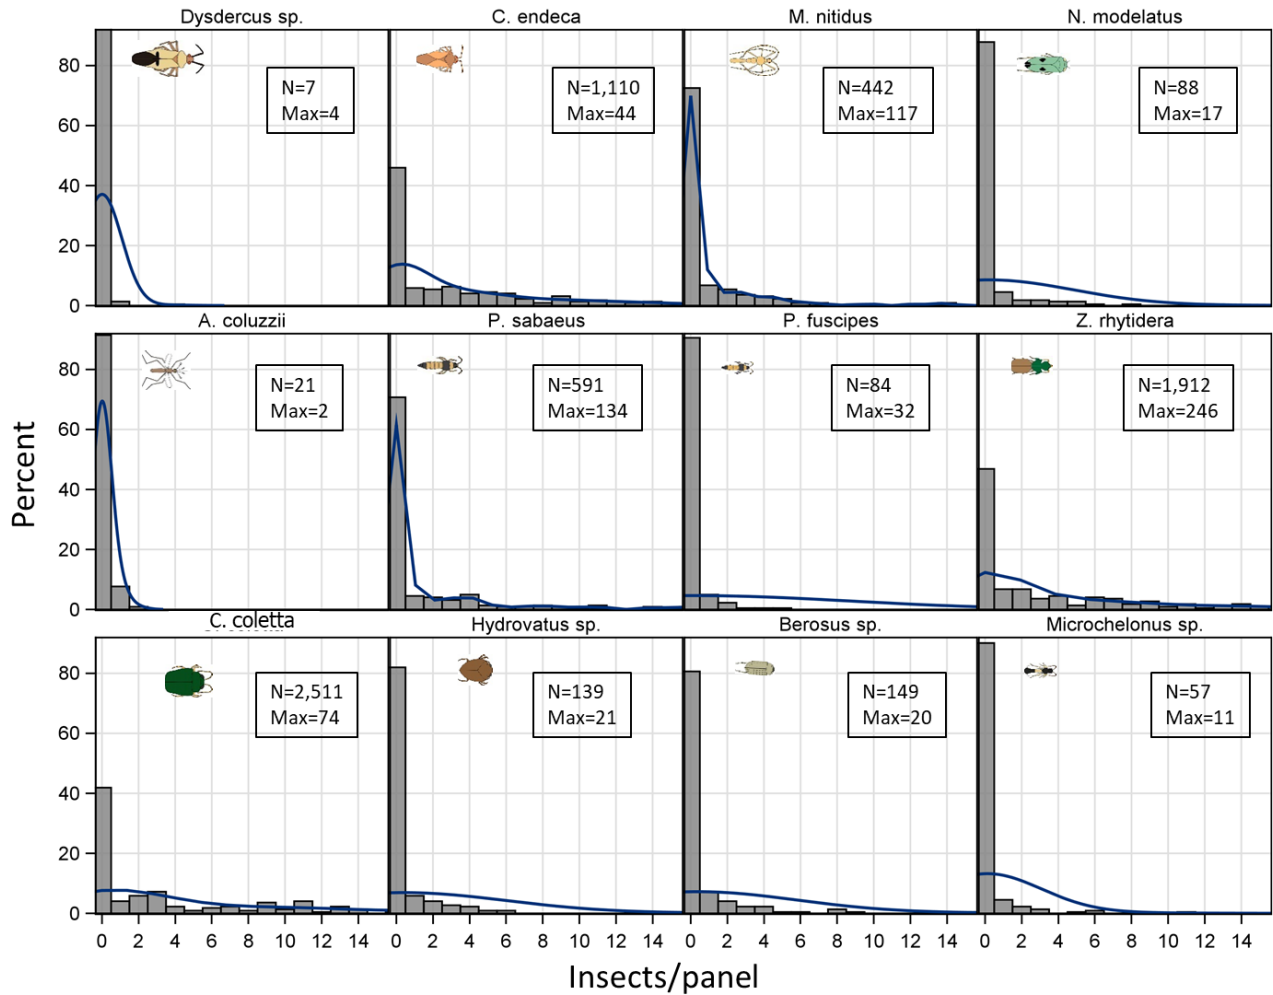

Figure S3. Seasonal variation in total-insect density/panel (note: sampling in 2013 ended in August). Inset: Relationship between panel density and aerial density (log scales). Pearson correlation coefficient (N reflects values larger than 0).

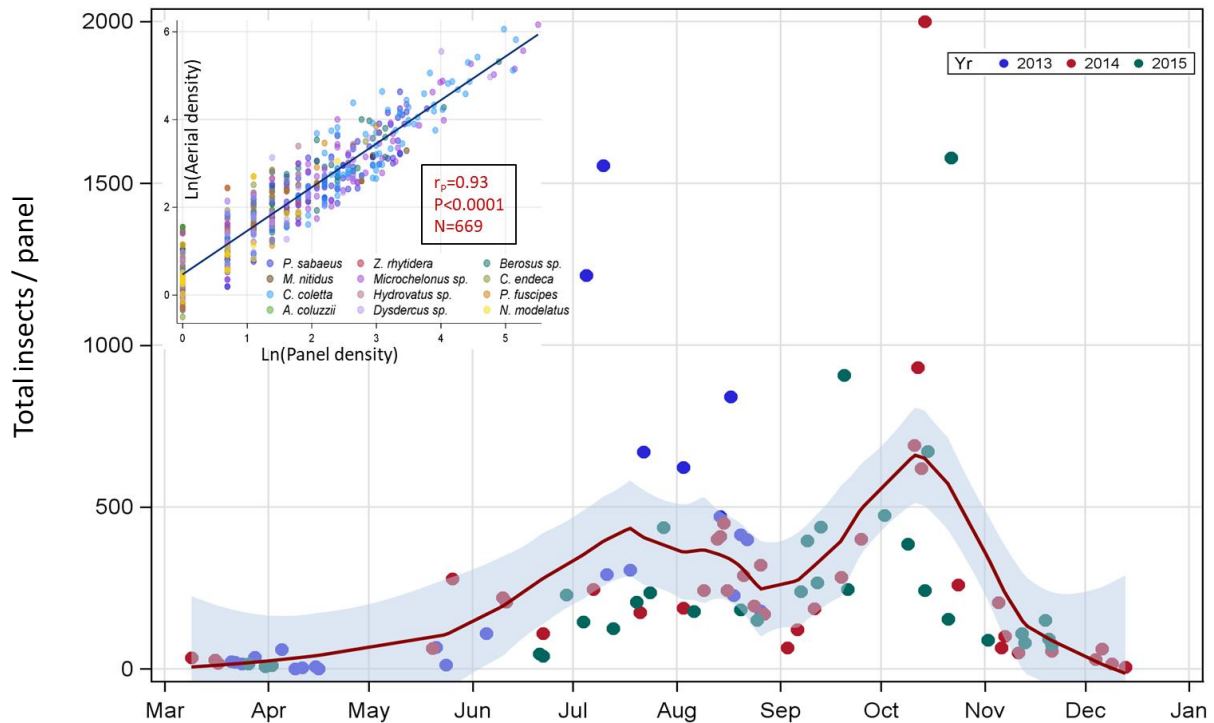

Figure S4. Distribution of mean nightly wind speed at flight height. Estimates are based on MERRA2 database and matched to the nearest panel altitude (50m, 70m and 200 m agl, see text from details).

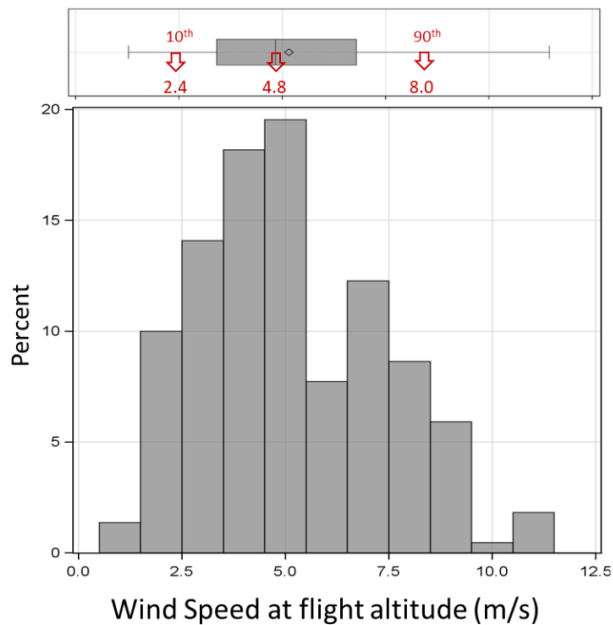

Figure S5: Weather conditions during high-altitude flight on the ground (red) and at flight height (blue) of each taxon. Weighted means (weighted by aerial density) and 95% CI on the ground and at flight height of (a) nightly temperature, (b) RH, and (c) wind speed are shown with corresponding wet season means (dashed lines labeled ‘W2m’ and ‘Air’) and year-round means at 2 m agl (dotted red lines labeled ‘Y2m’). Schematic insect silhouettes are not to scale.

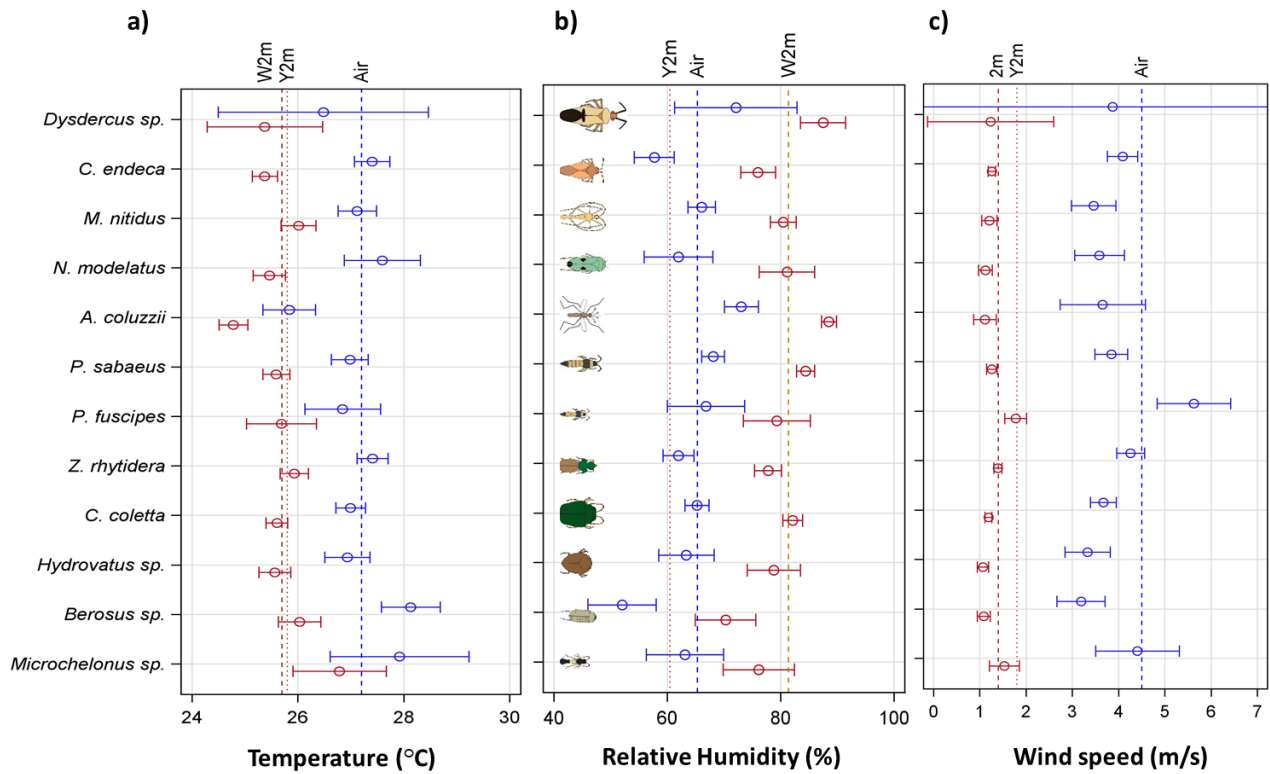



Table S1. List of identified insects from the project to-date.

| Collection Site                      | Collection Date | Height (m) | TubelID | Orig         | Order      | suborder  | superfamily    | family        | subfamily       | tribe          | genus                   | species                                 | TaxonomistName   |
|--------------------------------------|-----------------|------------|---------|--------------|------------|-----------|----------------|---------------|-----------------|----------------|-------------------------|-----------------------------------------|------------------|
| Markabougou, Mali                    | 3-Aug-13        |            | 40      | MB231A       | Coleoptera | Adephaga  | Caraboidea     | Carabidae     | Cicindelinae    | Cicindelini    | <i>Lophyra</i>          | <i>senegalensis</i> (Dejean, 1831)      | Schüle           |
| Thierola, Mali (13.6                 | 18-Aug-13       |            | 40      | TB386        | Coleoptera | Adephaga  | Caraboidea     | Carabidae     | Harpalinae      | Amblystomina   | <i>Amblystomus</i>      | <i>dispar</i> (Basilewsky, 1951)        | Schüle           |
| Thierola, Mali (13.6                 | 21-Mar-13       |            | 40      | TB204        | Coleoptera | Adephaga  | Caraboidea     | Carabidae     | Harpalinae      | Amblystomina   | <i>Amblystomus</i>      | <i>katanganus</i> (Burgeon, 1831)       | Schüle           |
| Thierola, Mali (13.6                 | 7-Sep-15        |            | 120     | TB960B       | Coleoptera | Adephaga  | Caraboidea     | Carabidae     | Harpalinae      | Amblystomina   | <i>Amblystomus</i>      | <i>latefasciatus</i> (Basilewsky, 1951) | Schüle           |
| Suigima, Mali (14.1                  | 21-May-13       |            | 40      | SB111A       | Coleoptera | Adephaga  | Caraboidea     | Carabidae     | Harpalinae      | Amblystomina   | <i>Amblystomus</i>      | <i>viridulus</i> (Erichson, 1843)       | Schüle           |
| Suigima, Mali (14.1                  | 21-May-13       |            | 40      | SB111A       | Coleoptera | Adephaga  | Caraboidea     | Carabidae     | Harpalinae      | Chlaeniini     | <i>Callistochrous</i>   | <i>baxi</i> (Gory, 1833)                | Schüle           |
| Suigima, Mali (14.1                  | 21-May-13       |            | 40      | SB111A       | Coleoptera | Adephaga  | Caraboidea     | Carabidae     | Harpalinae      | Harpalini      | <i>Afromizonus</i>      | <i>tecospilus</i> (Basilewsky, 1951)    | Schüle           |
| Suigima, Mali (14.1                  | 21-May-13       |            | 40      | SB111A       | Coleoptera | Adephaga  | Caraboidea     | Carabidae     | Harpalinae      | Harpalini      | <i>Egradroma</i>        | <i>discriminatus</i> (Basilewsky, 1951) | Schüle           |
| Suigima, Mali (14.1                  | 21-May-13       |            | 40      | SB111A       | Coleoptera | Adephaga  | Caraboidea     | Carabidae     | Harpalinae      | Harpalini      | <i>Platymetopus</i>     | <i>tesselatus</i> (Basilewsky, 1951)    | Schüle           |
| Thierola, Mali (13.6                 | 7-Sep-15        |            | 120     | TB960A       | Coleoptera | Adephaga  | Caraboidea     | Carabidae     | Lebiinae        | Lebiini        | <i>Metadromius</i>      | <i>royi</i> (Mateu, 1969)               | Schüle           |
| Thierola, Mali (13.6                 | 21-Mar-13       |            | 40      | TB204        | Coleoptera | Adephaga  | Caraboidea     | Carabidae     | Lebiinae        | Lebiini        | <i>Singilis</i>         | <i>bedimo</i> (Anichtchenko, 2002)      | Schüle           |
| Suigima, Mali (14.1                  | 21-May-13       |            | 40      | SB111A       | Coleoptera | Adephaga  | Caraboidea     | Carabidae     | Lebiinae        | Lebiini        | <i>Syntomus</i>         | <i>submaculatus</i> (Wollaston, 1854)   | Schüle           |
| Thierola, Mali (13.6                 | 14-Aug-14       |            | 160     | TB535B       | Coleoptera | Adephaga  | Caraboidea     | Carabidae     | Lebiinae        | Odacanthini    | <i>Lasiocera</i>        | <i>nitidula</i> (Dejean, 1831)          | Schüle           |
| Thierola, Mali (13.6                 | 7-Sep-15        |            | 120     | TB960A       | Coleoptera | Adephaga  | Caraboidea     | Carabidae     | Lebiinae        | Pentagoncini   | <i>Pentagonica</i>      | <i>elegans</i> (Peringuey, 1891)        | Schüle           |
| Thierola, Mali (13.6                 | 7-Sep-15        |            | 120     | TB960A       | Coleoptera | Adephaga  | Caraboidea     | Carabidae     | Trechinae       | Bembidiini     | <i>Polyderis</i>        | <i>sp.</i>                              | Schüle           |
| Suigima, Mali (14.1                  | 21-Nov-14       |            | 160     | SB574A       | Coleoptera | Adephaga  | Caraboidea     | Carabidae     | Trechinae       | Bembidiini     | <i>Sphaerotochys</i>    | <i>tetraspilus</i> (Solsky, 1874)       | Schüle           |
| Markabougou, Mali (13.9128, -6.3425) |                 |            |         | MB231A       | Coleoptera | Adephaga  | Dytiscoidea    | Dytiscidae    | Hydroporinae    |                | <i>Hydrovatus</i>       |                                         | Saverio Rocchi   |
| Markabougou, Mali                    | 20-Aug-13       |            | 40      | MB255A-CO-2  | Coleoptera | Adephaga  | Dytiscoidea    | Dytiscidae    | Laccophilinae   | Laccophilini   | <i>Laccophilus</i>      |                                         | Warren Steiner   |
| Markabougou, Mali                    | 13-Aug-14       |            | 190     | MB395A-CO-2  | Coleoptera | Adephaga  | Dytiscoidea    | Dytiscidae    |                 |                |                         |                                         | Warren Steiner   |
| Thierola, Mali (13.6                 | 28-Oct-14       |            | 160     | TB682A-CO-1  | Coleoptera | Adephaga  | Caraboidea     | Carabidae     | Brachininae     | Brachinini     | <i>Brachinus</i>        | <i>prob. dorsalis</i> Dejean            | Lourdes Chamorro |
| Thierola, Mali (13.6                 | 4-Jul-15        |            |         | TB820A       | Coleoptera | Adephaga  | Caraboidea     | Carabidae     | Lebiini         | Lebiini        | <i>Zolotarevskyella</i> | <i>prob. rhytidodera</i> (Csiki)        | Lourdes Chamorro |
| Thierola, Mali (13.6                 | 7-Sep-15        |            | 120     | TB960A       | Coleoptera | Adephaga  | Caraboidea     | Carabidae     | Trechinae       | Bembidiini     | <i>Tachyura</i>         | <i>biplagiatus</i> (Dejean, 1831)       | Schüle           |
| Thierola, Mali (13.6                 | 7-Sep-15        |            | 120     | TB960A       | Coleoptera | Adephaga  | Caraboidea     | Carabidae     | Trechinae       | Bembidiini     | <i>Tachyura</i>         | <i>cf. vagans</i> (Peringuey, 1891)     | Schüle           |
| Thierola, Mali (13.6                 | 7-Sep-15        |            | 120     | TB960A       | Coleoptera | Adephaga  | Caraboidea     | Carabidae     | Trechinae       | Bembidiini     | <i>Tachyura</i>         | <i>fumicata</i> (Motschulsky, 1806)     | Schüle           |
| Thierola, Mali (13.6                 | 18-Aug-13       |            | 40      | TB386        | Coleoptera | Adephaga  | Caraboidea     | Carabidae     | Trechinae       | Bembidiini     | <i>Tachyura</i>         | <i>spec.</i>                            | Schüle           |
| Suigima, Mali (14.1                  | 7-Jul-14        |            | 40      | SB286A-CO-8  | Coleoptera | Adephaga  | Caraboidea     | Carabidae     |                 |                |                         |                                         | Leonid Friedman  |
| Thierola, Mali (13.6583, -7.2155)    |                 |            |         | TB669A       | Coleoptera | Adephaga  | Bostrichoidea  | Bostrichidae  |                 |                |                         |                                         | Laura Verú       |
| Suigima, Mali (14.1                  | 7-Jul-14        |            | 40      | SB286A-CO-8  | Coleoptera | Polyphaga | Chrysomeloidea | Brentidae     | Galerucinae     |                |                         |                                         | Leonid Friedman  |
| Thierola, Mali (13.6583, -7.2155)    |                 |            |         | TB21A-CO-1   | Coleoptera | Polyphaga | Chrysomeloidea | Chrysomelidae | Bruchinae       | Pachymerini    | <i>Caryedon?</i>        |                                         | Laura Verú       |
| Thierola, Mali (13.6                 | 13-Aug-14       |            | 190     | TB533B-CO-5  | Coleoptera | Polyphaga | Chrysomeloidea | Chrysomelidae | Bruchinae       |                |                         |                                         | Leonid Friedman  |
| Markabougou, Mali                    | 15-Oct-14       |            |         | MB446A-CO-1  | Coleoptera | Polyphaga | Chrysomeloidea | Chrysomelidae | Criocerinae     |                |                         |                                         | Lourdes Chamorro |
| Markabougou, Mali                    | 20-Aug-13       |            | 40      | MB255A-CO-2  | Coleoptera | Polyphaga | Chrysomeloidea | Chrysomelidae | Eumolpinae      |                |                         |                                         | Lourdes Chamorro |
| Markabougou, Mali                    | 7-Jul-14        |            | 120     | MB320A       | Coleoptera | Polyphaga | Chrysomeloidea | Chrysomelidae | Galerucinae     | Alticini       | <i>Aphthona</i>         | <i>laevissima</i> (Wollaston)           | Maurizio Biondi  |
| Markabougou, Mali                    | 7-Jul-14        |            | 120     | MB320A       | Coleoptera | Polyphaga | Chrysomeloidea | Chrysomelidae | Galerucinae     | Alticini       | <i>Aphthona</i>         | <i>signatifrons</i> (Wollaston)         | Maurizio Biondi  |
| Markabougou, Mali                    | 13-Aug-14       |            | 190     | MB395B-CO-3  | Coleoptera | Polyphaga | Chrysomeloidea | Chrysomelidae | Galerucinae     | Alticini       | <i>Aphthona</i>         | <i>whitfieldi</i> (Bryant)              | Furth            |
| Markabougou, Mali                    | 7-Jul-14        |            | 120     | MB320A       | Coleoptera | Polyphaga | Chrysomeloidea | Chrysomelidae | Galerucinae     | Alticini       | <i>Aphthona</i>         | <i>whitfieldi</i> (Bryant)              | Maurizio Biondi  |
| Markabougou, Mali                    | 14-Aug-14       |            | 190     | MB398B       | Coleoptera | Polyphaga | Chrysomeloidea | Chrysomelidae | Galerucinae     | Alticini       | <i>Chaetocnema</i>      | <i>coletta</i> (Bechyné)                | Maurizio Biondi  |
| Markabougou, Mali                    | 24-Oct-14       |            | 120     | MB474A       | Coleoptera | Polyphaga | Chrysomeloidea | Chrysomelidae | Galerucinae     | Alticini       | <i>Longitarsus</i>      | <i>sp. 1</i>                            | Maurizio Biondi  |
| Markabougou, Mali                    | 7-Jul-14        |            | 120     | MB320A       | Coleoptera | Polyphaga | Chrysomeloidea | Chrysomelidae | Galerucinae     | Alticini       | <i>Longitarsus</i>      | <i>sp. 2</i>                            | Maurizio Biondi  |
| Suigima, Mali (14.1                  | 10-Aug-14       |            | 190     | SB362A-CO-9  | Coleoptera | Polyphaga | Chrysomeloidea | Chrysomelidae | Galerucinae     | Alticini       |                         |                                         | Maurizio Biondi  |
| Markabougou, Mali                    | 9-Aug-14        |            | 190     | MB386A       | Coleoptera | Polyphaga | Chrysomeloidea | Chrysomelidae | Galerucinae     | Luperini       | <i>Afromaculepta</i>    | <i>decemmaculata</i>                    | Thomas Wagner    |
| Thierola, Mali (13.6                 | 16-Mar-14       |            | 40      | TB416A-CO-4  | Coleoptera | Polyphaga | Chrysomeloidea | Chrysomelidae | Galerucinae     | Luperini       | <i>Monolepta</i>        | <i>sp. 1</i>                            | Furth            |
| Thierola, Mali (13.6583, -7.2155)    |                 |            |         | TB392A-CO-3  | Coleoptera | Polyphaga | Chrysomeloidea | Chrysomelidae | Galerucinae     | Luperini       | <i>Monolepta</i>        | <i>sp. 2</i>                            | Furth            |
| Thierola, Mali (13.6                 | 14-Oct-14       |            | 120     | TB639A       | Coleoptera | Polyphaga | Chrysomeloidea | Chrysomelidae | Galerucinae     | Luperini       | <i>Monolepta</i>        | <i>sp. 3</i>                            | Furth            |
| Thierola, Mali (13.6                 | 5-Jul-13        |            | 40      | TB321A       | Coleoptera | Polyphaga | Chrysomeloidea | Chrysomelidae | Galerucinae     | Luperini       | <i>Panafrorepta</i>     | <i>dahlmani</i>                         | Thomas Wagner    |
| Suigima, Mali (14.1                  | 17-Aug-13       |            | 160     | SB179A       | Coleoptera | Polyphaga | Cucujoidea     | Coccinellidae | Coccidulini     |                |                         |                                         | Shockley         |
| Markabougou, Mali                    | 15-Oct-14       |            |         | MB446A-CO-2  | Coleoptera | Polyphaga | Cucujoidea     | Coccinellidae |                 |                |                         |                                         | Warren Steiner   |
| Markabougou, Mali                    | 13-Aug-14       |            | 190     | MB395A-CO-2  | Coleoptera | Polyphaga | Cucujoidea     | Nitidulidae   |                 |                |                         |                                         | Warren Steiner   |
| Suigima, Mali (14.1                  | 11-Sep-14       |            | 120     | SB444A-CO-1  | Coleoptera | Polyphaga | Cucujoidea     | Phalacridae   |                 |                |                         |                                         | Warren Steiner   |
| Thierola, Mali (13.6                 | 20-May-14       |            |         | TB426B       | Coleoptera | Polyphaga | Curculionoidea | Attelabidae   | Rhynchitinae    |                |                         | <i>sp. 1</i>                            | Lourdes Chamorro |
| Markabougou, Mali                    | 15-Aug-14       |            | 160     | MB397A-CO-9  | Coleoptera | Polyphaga | Curculionoidea | Brentidae     | Nanophyinae     |                | <i>Nanophyes</i>        | <i>poss. errans</i>                     | Lourdes Chamorro |
| Thierola, Mali (13.6                 | 10-Aug-14       |            | 190     | TB527A-CO-5  | Coleoptera | Polyphaga | Curculionoidea | Brentidae     | Nanophyinae     |                | <i>Nanophyes</i>        | <i>sp. 1</i>                            | Lourdes Chamorro |
| Thierola, Mali (13.6                 | 18-Aug-13       |            | 40      | TB386A       | Coleoptera | Polyphaga | Curculionoidea | Brentidae     | Nanophyinae     |                | <i>Nanophyes</i>        | <i>sp. 2</i>                            | Lourdes Chamorro |
| Suigima, Mali (14.1                  | 11-Sep-14       |            | 120     | SB444A-CO-6  | Coleoptera | Polyphaga | Curculionoidea | Brentidae     | Apioninae       |                |                         |                                         | Lourdes Chamorro |
| Suigima, Mali (14.1                  | 7-Sep-15        |            |         | SB725        | Coleoptera | Polyphaga | Curculionoidea | Curculionidae | Bagoinae        |                | <i>Bagous</i>           | <i>sp. 1</i>                            | Lourdes Chamorro |
| Thierola, Mali (13.6                 | 16-Mar-14       |            |         | TB418A       | Coleoptera | Polyphaga | Curculionoidea | Curculionidae | Baridinae       |                |                         | <i>sp. 1</i>                            | Lourdes Chamorro |
| Thierola, Mali (13.6                 | 17-Mar-14       |            | 120     | TB420A       | Coleoptera | Polyphaga | Curculionoidea | Curculionidae | Baridinae       | Baridini       | <i>Baris</i>            | <i>picturatus</i>                       | Lourdes Chamorro |
| Suigima, Mali (14.1                  | 21-Nov-16       |            | 160     | SB574A-CO-11 | Coleoptera | Polyphaga | Curculionoidea | Curculionidae | Baridinae       |                |                         | <i>sp. 3</i>                            | Lourdes Chamorro |
| Markabougou, Mali                    | 22-Aug-13       |            |         | MB262A       | Coleoptera | Polyphaga | Curculionoidea | Curculionidae | Brachycerinae   |                |                         | <i>sp. 1</i>                            | Lourdes Chamorro |
| Suigima, Mali (14.1                  | 7-Jul-14        |            |         | SB288A       | Coleoptera | Polyphaga | Curculionoidea | Curculionidae | Brachycerinae   |                |                         | <i>sp. 2</i>                            | Lourdes Chamorro |
| Thierola, Mali (13.6                 | 7-Sep-15        |            |         | TB960A       | Coleoptera | Polyphaga | Curculionoidea | Curculionidae | Brachycerinae   |                |                         | <i>sp. 3</i>                            | Lourdes Chamorro |
| Suigima, Mali (14.1                  | 20-Jul-15       |            | 190     | SB662A       | Coleoptera | Polyphaga | Curculionoidea | Curculionidae | Ceutorhynchinae | Ceutorhynchini | <i>Nr. Neocoeliodes</i> | <i>sp. 1</i>                            | Lourdes Chamorro |

|                                      |           |                   |            |            |                |                |               |                 |                                               |           |                    |
|--------------------------------------|-----------|-------------------|------------|------------|----------------|----------------|---------------|-----------------|-----------------------------------------------|-----------|--------------------|
| Thierola, Mali (13.6                 | 13-Nov-15 | 120 TB1095A-CO-17 | Coleoptera | Polyphaga  | Curculionoidea | Curculionidae  | Conoderinae   |                 | <i>Lobotrachelus</i>                          | sp. 1     | Lourdes Chamorro   |
| Thierola, Mali (13.6                 | 6-Sep-14  | 190 TB593A-CO-19  | Coleoptera | Polyphaga  | Curculionoidea | Curculionidae  | Curculioninae | Ochrymerini     | <i>Endaeus</i>                                | sp. 1     | Lourdes Chamorro   |
| Suigima, Mali (14.1                  | 10-Jul-13 | 120 SB127A-CO-5   | Coleoptera | Polyphaga  | Curculionoidea | Curculionidae  | Curculioninae | Rhamphini       |                                               | sp. 1     | Lourdes Chamorro   |
| Thierola, Mali (13.6                 | 5-Jul-13  | 40 TB321A         | Coleoptera | Polyphaga  | Curculionoidea | Curculionidae  | Curculioninae | Smicronychini   | <i>Afrosmicronyx dorsomaculatus</i> (Julien F |           | Lourdes Chamorro   |
| Markabougou, Mali                    | 26-Mar-15 | 190 MB544A-CO-6   | Coleoptera | Polyphaga  | Curculionoidea | Curculionidae  | Curculioninae | Smicronychini   | <i>Afrosmicronyx umbrinus</i>                 |           | Lourdes Chamorro   |
| Thierola, Mali (13.6                 | 9-Mar-14  | 160 TB397A        | Coleoptera | Polyphaga  | Curculionoidea | Curculionidae  | Curculioninae | Smicronychini   | <i>Sharpia bella</i>                          |           | Lourdes Chamorro   |
| Suigima, Mali (14.1                  | 7-Jul-14  | 160 SB288A        | Coleoptera | Polyphaga  | Curculionoidea | Curculionidae  | Curculioninae | Smicronychini   | <i>Smicronyx gossypii</i> (Haran)             |           | Lourdes Chamorro   |
| Markabougou, Mali                    | 15-Aug-14 | 160 MB397A-CO-8   | Coleoptera | Polyphaga  | Curculionoidea | Curculionidae  | Curculioninae | Smicronychini   | <i>Smicronyx zambianus n. sp.</i> (Hara       |           | Julien Haran & Lo  |
| Suigima, Mali (14.1                  | 22-May-13 | 160 SB113A-CO-7   | Coleoptera | Polyphaga  | Curculionoidea | Curculionidae  | Lixinae       | Lixini          | <i>Microlarinus</i>                           | sp.       | Lourdes Chamorro   |
| Suigima, Mali (14.1666, -7.2332)     |           |                   |            |            |                |                |               |                 |                                               |           | Laura Veru         |
| Markabougou, Mali                    | 13-Aug-14 | 190 MB395A-CO-8   | Coleoptera | Polyphaga  | Curculionoidea | Curculionidae  |               |                 |                                               |           | Lourdes Chamorro   |
| Markabougou, Mali                    | 22-Aug-13 | MB262A            | Coleoptera | Polyphaga  | Curculionoidea | Erorhinidae    | Erirhininae   |                 |                                               | sp. 1     | Lourdes Chamorro   |
| Markabougou, Mali                    | 7-Jul-14  | MB319A            | Coleoptera | Polyphaga  | Curculionoidea | Brentidae      | Brentinae     | Apioninae       |                                               | #1 female | Lourdes Chamorro   |
| Thierola, Mali (13.6                 | 5-Jul-13  | TB322C            | Coleoptera | Polyphaga  | Curculionoidea | Brentidae      | Apioninae     | Apioninae       |                                               | #1 male   | Lourdes Chamorro   |
| Markabougou, Mali                    | 25-Sep-14 | MB429E            | Coleoptera | Polyphaga  | Curculionoidea | Brentidae      | Apioninae     | Apioninae       |                                               | #2 female | Lourdes Chamorro   |
| Thierola, Mali (13.6                 | 5-Jul-13  | TB322A            | Coleoptera | Polyphaga  | Curculionoidea | Brentidae      | Apioninae     | Apioninae       |                                               | #2 male   | Lourdes Chamorro   |
| Thierola, Mali (13.6                 | 11-Oct-14 | TB630A            | Coleoptera | Polyphaga  | Curculionoidea | Brentidae      | Apioninae     | Apioninae       |                                               | #3        | Lourdes Chamorro   |
| Thierola, Mali (13.6                 | 11-Oct-14 | TB630A            | Coleoptera | Polyphaga  | Curculionoidea | Brentidae      | Apioninae     | Apioninae       |                                               | #4        | Lourdes Chamorro   |
| Thierola, Mali (13.6                 | 21-Jul-14 | TB502B            | Coleoptera | Polyphaga  | Curculionoidea | Brentidae      | Apioninae     | Apioninae       |                                               | #5        | Lourdes Chamorro   |
| Markabougou, Mali                    | 24-Oct-14 | MB474A            | Coleoptera | Polyphaga  | Curculionoidea | Brentidae      | Apioninae     | Apioninae       |                                               | #6        | Lourdes Chamorro   |
| Thierola, Mali (13.6                 | 7-Jul-14  | TB463D            | Coleoptera | Polyphaga  | Curculionoidea | Brentidae      | Apioninae     | Apioninae       |                                               | #7        | Lourdes Chamorro   |
| Markabougou, Mali                    | 7-Jul-14  | MB319A            | Coleoptera | Polyphaga  | Curculionoidea | Brentidae      | Apioninae     | Apioninae       |                                               | #8        | Lourdes Chamorro   |
| Thierola, Mali (13.6                 | 22-Oct-15 | TB1056B           | Coleoptera | Polyphaga  | Curculionoidea | Brentidae      | Apioninae     | Apioninae       | <i>Conapium</i> #1                            |           | Lourdes Chamorro   |
| Thierola, Mali (13.6                 | 22-Oct-15 | TB1056B           | Coleoptera | Polyphaga  | Curculionoidea | Brentidae      | Apioninae     | Apioninae       | <i>Conapium</i> #2                            |           | Lourdes Chamorro   |
| Markabougou, Mali                    | 7-Jul-14  | MB319A            | Coleoptera | Polyphaga  | Curculionoidea | Curculionidae  | Curculioninae |                 |                                               | sp. 1     | Lourdes Chamorro   |
| Thierola, Mali (13.6                 | 7-Jul-14  | TB463D            | Coleoptera | Polyphaga  | Curculionoidea | Brentidae      | Apioninae     | Piezotrachelini |                                               | #1        | Lourdes Chamorro   |
| Markabougou, Mali                    | 26-Aug-13 | MB272A            | Coleoptera | Polyphaga  | Curculionoidea | Brentidae      | Apioninae     | Pizeotrachelini |                                               | #2        | Lourdes Chamorro   |
| Markabougou, Mali                    | 15-Aug-14 | 160 MB397A-CO-1   | Coleoptera | Polyphaga  | Elateroidea    | Elateridae     |               |                 |                                               |           | Warren Steiner/Lc  |
| Suigima, Mali (14.1                  | 11-Sep-14 | 120 SB444A-CO-1   | Coleoptera | Polyphaga  | Hydrophiloidea | Hydrophilidae  | Hydrophilinae | Berosini        | <i>Berosus</i>                                |           | Warren Steiner     |
| Markabougou, Mali                    | 15-Aug-14 | 160 MB397A-CO-1   | Coleoptera | Polyphaga  | Hydrophiloidea | Hydrophilidae  |               |                 |                                               |           | Warren Steiner     |
| Thierola, Mali (13.6                 | 3-Aug-14  | TB512A-CO-2       | Coleoptera | Polyphaga  | Scarabaeoidea  | Scarabaeidae   |               |                 |                                               |           | Lourdes Chamorro   |
| Markabougou, Mali                    | 13-Aug-14 | 190 MB395A-CO-2   | Coleoptera | Polyphaga  | Staphylinoidea | Staphilinidae  | Pselaphinae   |                 |                                               |           | Warren Steiner     |
| Suigima, Mali (14.1                  | 10-Aug-14 | 190 SB362A-CO-9   | Coleoptera | Polyphaga  | Staphylinoidea | Staphylinae    |               |                 |                                               |           | Leonid Friedman    |
| Suigima, Mali (14.1                  | 19-Jul-14 | 90 SB326A-CO-1    | Coleoptera | Polyphaga  | Staphylinoidea | Staphilinidae  | Aleocharinae  | Lomechusini     | <i>Diplopleurus</i>                           |           | Dr. Jan Klimaszew  |
| Thierola, Mali (13.6                 | 13-Aug-14 | 160 TB532A-CO-1   | Coleoptera | Polyphaga  | Staphylinoidea | Staphilinidae  | Aleocharinae  | Lomechusini     | <i>Paramyrmococia bipustulata</i>             |           | Dr. Jan Klimaszew  |
| Thierola, Mali (13.6                 | 05-Aug-13 | 160 TB374A-CO-3   | Coleoptera | Polyphaga  | Staphylinoidea | Staphilinidae  | Aleocharinae  | Lomechusini     | <i>Zyras (Ctenodonia)</i>                     |           | Dr. Jan Klimaszew  |
| Thierola, Mali (13.6                 | 13-Aug-14 | 160 TB532A-CO-1   | Coleoptera | Polyphaga  | Staphylinoidea | Staphilinidae  | Paederinae    | Paederini       | <i>Paederus fuscipes</i> (Curtis)             |           | Dr. Frank          |
| Suigima, Mali (14.1                  | 06-Sep-14 | 190 SB431A-CO-1   | Coleoptera | Polyphaga  | Staphylinoidea | Staphilinidae  | Paederinae    | Paederini       | <i>Paederus sabaeus</i> (Erichson)            |           | Dr. Frank          |
| Thierola, Mali (13.6                 | 13-Aug-14 | 160 TB532A-CO-1   | Coleoptera | Polyphaga  | Staphylinoidea | Staphilinidae  | Paederinae    | Paederini       | <i>Paederus</i>                               |           | Dr. Frank          |
| Thierola, Mali (13.6                 | 13-Aug-14 | 160 TB532A-CO-1   | Coleoptera | Polyphaga  | Staphylinoidea | Staphilinidae  | Staphylininae | Staphylinini    | <i>Gabronthus maritimus</i> (Motschulsky)     |           | Dr. Frank          |
| Thierola, Mali (13.6                 | 14-Sep-14 | 160 TB616A-CO-1   | Coleoptera | Polyphaga  | Staphylinoidea | Staphilinidae  | Staphylininae | Staphylinini    | <i>Gabronthus</i>                             |           | Dr. Frank          |
| Markabougou, Mali                    | 10-Jul-13 | 120 MB214A-CO-3   | Coleoptera | Polyphaga  | Staphylinoidea | Staphilinidae  | Staphylininae | Staphylinini    | <i>Philonthus</i>                             |           | Dr. Frank          |
| Thierola, Mali (13.6                 | 10-Aug-14 | 190 TB527A-CO-6   | Coleoptera | Polyphaga  | Tenebrionoidea | Aderidae       |               |                 |                                               |           | Warren Steiner     |
| Suigima, Mali (14.1                  | 11-Sep-14 | 120 SB444A-CO-7   | Coleoptera | Polyphaga  | Tenebrionoidea | Anthicidae     |               |                 |                                               |           | Warren Steiner     |
| Markabougou, Mali (13.9128, -6.3425) |           | MB476B            | Coleoptera | Polyphaga  | Tenebrionoidea | Mordellidae    |               |                 |                                               |           | Laura Veru         |
| Markabougou, Mali                    | 10-Jul-13 | 120 MB214A-DI-2   | Diptera    | Brachycera | Carnoidea      | Chloropidae    |               |                 | <i>Epimadiza</i>                              |           | Amnon Freidberg    |
| Suigima, Mali (14.1                  | 10-Aug-14 | 190 SB362A-DI-1   | Diptera    | Brachycera | Carnoidea      | Chloropidae    |               |                 |                                               |           | John Ismay         |
| Markabougou, Mali                    | 14-Aug-13 | 160 MB242A-DI-3   | Diptera    | Brachycera | Carnoidea      | Milichiidae    | Madizinae     |                 | <i>Phyllomyza</i>                             |           | Amnon Freidberg    |
| Thierola, Mali (13.6583, -7.2155)    |           | TB513B            | Diptera    | Brachycera | Diopsoidea     | Diopsidae      | Diopsinae     | Diopsini        | <i>Diopsis</i>                                |           |                    |
| Markabougou, Mali                    | 14-Aug-14 | 190 MB398A-DI-3   | Diptera    | Brachycera | Empidoidea     | Dolichopodidae |               |                 |                                               |           | Igor Grichanov     |
| Markabougou, Mali                    | 13-Aug-14 | 160 MB394B-DI-3   | Diptera    | Brachycera | Ephydroidea    | Curtonotidae   |               |                 | <i>Curtonotum</i>                             |           | Ashley Kirk-Sprigg |
| Thierola, Mali (13.6                 | 6-Sep-14  | 160 TB593A-DI-5   | Diptera    | Brachycera | Ephydroidea    | Drosophilidae  | Steganinae    | Steganini       | <i>Leucophenga</i>                            |           | Amnon Freidberg    |
| Thierola, Mali (13.6                 | 13-Aug-14 | 190 TB533A-DI-4   | Diptera    | Brachycera | Ephydroidea    | Drosophilidae  |               |                 |                                               |           | Shane McEvey       |
| Markabougou, Mali                    | 7-Nov-14  | 160 MB493A-DI-2   | Diptera    | Brachycera | Ephydroidea    | Ephydridae     | Discomyzinae  | Psilopini       | <i>Psitola</i>                                |           | Amnon Freidberg    |
| Thierola, Mali (13.6                 | 6-Sep-14  | 160 TB593A-DI-4   | Diptera    | Brachycera | Ephydroidea    | Ephydridae     | Hydrellinae   |                 | <i>Notiphila</i>                              |           | Amnon Freidberg    |
| Markabougou, Mali                    | 10-Jul-13 | 120 MB214A-DI-1   | Diptera    | Brachycera | Ephydroidea    | Ephydridae     |               |                 |                                               |           | Tadeusz Zatwarni   |
| Markabougou, Mali                    | 19-Jul-14 | 190 MB353A-DI-1   | Diptera    | Brachycera | Lauxanioidae   | Lauxaniidae    |               |                 |                                               |           | Stephen Gaimari    |
| Thierola, Mali (13.6                 | 13-Aug-14 | 190 TB533B-DI-4   | Diptera    | Brachycera | Muscoidea      | Anthomyiidae   |               |                 |                                               |           | Verner Michelsen   |
| Markabougou, Mali                    | 14-Aug-13 | 40 MB240A-DI-4    | Diptera    | Brachycera | Muscoidea      | Muscidae       | Muscinae      | Muscini         | <i>Musca</i>                                  |           | Amnon Freidberg    |
| Markabougou, Mali                    | 14-Aug-13 | 40 MB240A-DI-4    | Diptera    | Brachycera | Muscoidea      | Muscidae       | Muscinae      | Stomoxyni       |                                               |           | Amnon Freidberg    |
| Markabougou, Mali                    | 14-Aug-14 | 190 MB398A-DI-2   | Diptera    | Brachycera | Muscoidea      | Muscidae       | Phaoniinae    | Atherigonini    | <i>Atherigona</i>                             |           | Burgert Muller     |
| Markabougou, Mali                    | 14-Aug-13 | 40 MB240A-DI-4    | Diptera    | Brachycera | Muscoidea      | Muscidae       |               |                 |                                               |           | Marcia Couri       |
| Markabougou, Mali                    | 22-Aug-13 | 40 MB261A-DI-1    | Diptera    | Brachycera | Oestroidea     | Calliphoridae  | Chrysomyiinae | Rhiniini        | <i>Rhynchomyia</i>                            |           | Amnon Freidberg    |

|                                      |           |                 |           |                 |                |                  |                 |                 |  |                 |                      |
|--------------------------------------|-----------|-----------------|-----------|-----------------|----------------|------------------|-----------------|-----------------|--|-----------------|----------------------|
| Markabougou, Mali                    | 14-Aug-13 | 40 MB240A-DI-2  | Diptera   | Brachycera      | Oestroidea     | Calliphoridae    | Chrysomyiinae   | Rhiniini        |  |                 | Amnon Freidberg      |
| Markabougou, Mali                    | 14-Aug-13 | 160 MB242A-DI-3 | Diptera   | Brachycera      | Oestroidea     | Rhiniidae        |                 |                 |  |                 | Knut Rognes          |
| Markabougou, Mali                    | 14-Aug-13 | 40 MB240A-DI-4  | Diptera   | Brachycera      | Oestroidea     | Tachinidae       |                 |                 |  |                 | Pierfilippo Cerretti |
| Suigima, Mali (14.1                  | 19-Jul-14 | 90 SB326A-DI-1  | Diptera   | Brachycera      | Platyezoidea   | Phoridae         |                 |                 |  |                 | Amnon Freidberg      |
| Markabougou, Mali                    | 10-Jul-13 | 120 MB214A-DI-1 | Diptera   | Brachycera      | Sciomyzoidea   | Sepsidae         |                 |                 |  |                 | Andrey Ozerov        |
| Thierola, Mali (13.6                 | 13-Aug-14 | 160 TB532A-DI-1 | Diptera   | Brachycera      | Syrphoidea     | Pipunculidae     |                 |                 |  |                 | Marc De Meyer        |
| Thierola, Mali (13.6                 | 13-Aug-14 | 190 TB533B-DI-3 | Diptera   | Brachycera      | Tephritoidea   | Lonchaeidae      | Lonchaeinae     |                 |  | Silba           | Amnon Freidberg      |
| Thierola, Mali (13.6                 | 24-Aug-14 | 190 TB563B-DI-4 | Diptera   | Brachycera      | Tephritoidea   | Platystomatidae  |                 |                 |  |                 | Andrew Whittington   |
| Thierola, Mali (13.6                 | 6-Sep-14  | 160 TB593A-DI-4 | Diptera   | Brachycera      | Tephritoidea   | Tephritidae      | Dacinae         | Ceratidini      |  | Ceratitis       | Marc De Meyer        |
| Markabougou, Mali                    | 14-Aug-13 | 160 MB242A-DI-4 | Diptera   | Brachycera      | Tephritoidea   | Ulidiidae        | Ulidiinae       | Ulidiini        |  | Physiphora      | Elena Kameneva       |
| Thierola, Mali (13.6                 | 13-Aug-14 | 160 TB532B-DI-1 | Diptera   | Nematocera      | Chironomoidea  | Ceratopogonidae  |                 |                 |  |                 | Amnon Freidberg      |
| Markabougou, Mali                    | 14-Aug-13 | 160 MB242A-DI-2 | Diptera   | Nematocera      | Chironomoidea  | Chironomidae     |                 |                 |  |                 | Torbjorn Ekrem       |
| Thierola, Mali (13.6                 | 7-Jul-14  | 120 TB461A      | Diptera   | Nematocera      | Culicomorpha   | Simuliidae       | Simuliinae      |                 |  | Simulium        | griseicolle          |
| Thierola, Mali (13.6                 | 6-Sep-14  | 190 TB593A      | Hemiptera | Auchenorrhyncha | Fulgoroidea    | Delphacidae      | Delphacinae     | Delphacini      |  | Leptodelphax    | maculigera           |
| Thierola, Mali (13.6                 | 17-Oct-14 | 190 TB650A      | Hemiptera | Auchenorrhyncha | Fulgoroidea    | Delphacidae      | Delphacinae     | Delphacini      |  | Perkinsiella    | dorsata              |
| Thierola, Mali (13.6                 | 9/14/2014 | 160 TB616A      | Hemiptera | Auchenorrhyncha | Fulgoroidea    | Delphacidae      | Delphacinae     | Delphacini      |  | Sogatella       | albofimbriata        |
| Markabougou, Mali (13.9128, -6.3425) |           | MB395B-HO-5     | Hemiptera | Auchenorrhyncha | Fulgoroidea    | Delphacidae      | Delphacinae     | Delphacini      |  | Sogatella       | cf. albofimbriata    |
| Thierola, Mali (13.6                 | 20-Aug-13 | 120 TB393A-HO-2 | Hemiptera | Auchenorrhyncha | Fulgoroidea    | Delphacidae      | Delphacinae     | Delphacini      |  | Sogatella       | cf. furcifera        |
| Thierola, Mali (13.6                 | 14-Sep-14 | 160 TB616A      | Hemiptera | Auchenorrhyncha | Fulgoroidea    | Delphacidae      | Delphacinae     | Delphacini      |  | Sogatella       | nigeriensis          |
| Thierola, Mali (13.6583, -7.2155)    |           | TB462C          | Hemiptera | Auchenorrhyncha | Fulgoroidea    | Delphacidae      | Delphacinae     | Delphacini      |  | Sogatella       | vibex                |
| Thierola, Mali (13.6583, -7.2155)    |           | TB616A-HO-3     | Hemiptera | Auchenorrhyncha | Fulgoroidea    | Delphacidae      | Delphacinae     | Delphacini      |  | Sogatella       |                      |
| Thierola, Mali (13.6                 | 13-Aug-14 | 190 TB533A      | Hemiptera | Auchenorrhyncha | Fulgoroidea    | Delphacidae      | Delphacinae     | Delphacini      |  | Thriambus       | strennus             |
| Thierola, Mali (13.6                 | 13-Aug-14 | 190 TB533A      | Hemiptera | Auchenorrhyncha | Fulgoroidea    | Delphacidae      | Delphacinae     | Delphacini      |  | Toya            | ceresensis           |
| Thierola, Mali (13.6                 | 14-Sep-14 | 160 TB616A      | Hemiptera | Auchenorrhyncha | Fulgoroidea    | Delphacidae      | Delphacinae     | Delphacini      |  | Toya            | tuberculosa          |
| Thierola, Mali (13.6583, -7.2155)    |           | TB527A-HO-1     | Hemiptera | Auchenorrhyncha | Fulgoroidea    | Delphacidae      | Delphacinae     | Delphacini      |  |                 |                      |
| Thierola, Mali (13.6                 | 6-Sep-14  | 160 TB593A-HO-8 | Hemiptera | Auchenorrhyncha | Fulgoroidea    | Delphacidae      | Delphacinae     | Delphacini      |  | Stenocranus     |                      |
| Thierola, Mali (13.6583, -7.2155)    |           | TB426A          | Hemiptera | Auchenorrhyncha | Fulgoroidea    | Flatidae         |                 |                 |  |                 | Charles Bartlett     |
| Thierola, Mali (13.6583, -7.2155)    |           | TB650A          | Hemiptera | Auchenorrhyncha | Fulgoroidea    | Ricaniidae       |                 |                 |  |                 | Charles Bartlett     |
| Thierola, Mali (13.6                 | 13-Aug-14 | 160 TB532B      | Hemiptera | Auchenorrhyncha | Membracoidea   | Cicadellidae     | Deltocephalinae | Chiasmini       |  | Exitianus       | distanti             |
| Thierola, Mali (13.6 3-Aug-14        |           | TB512A-HO-1     | Hemiptera | Auchenorrhyncha | Membracoidea   | Cicadellidae     | Deltocephalinae | Chiasmini       |  | Exitianus       |                      |
| Markabougou, Mali                    | 7-Nov-14  | 160 MB493A      | Hemiptera | Auchenorrhyncha | Membracoidea   | Cicadellidae     | Deltocephalinae | Chiasmini       |  | Nephotettix     | modulatus            |
| Thierola, Mali (13.6583, -7.2155)    |           | TB752A-HO-4     | Hemiptera | Auchenorrhyncha | Membracoidea   | Cicadellidae     | Deltocephalinae | Chiasmini       |  | Nephotettix     | cf. modulatus        |
| Thierola, Mali (13.6                 | 13-Aug-14 | 190 TB533A-HO-1 | Hemiptera | Auchenorrhyncha | Membracoidea   | Cicadellidae     | Deltocephalinae | Paralimnini     |  | Psammotettix    |                      |
| Thierola, Mali (13.6                 | 24-Aug-14 | 190 TB563A      | Hemiptera | Auchenorrhyncha | Membracoidea   | Cicadellidae     | Deltocephalinae | Paralimnini     |  |                 | James Zahniser       |
| Thierola, Mali (13.6583, -7.2155)    |           | TB650A          | Hemiptera | Auchenorrhyncha | Membracoidea   | Cicadellidae     | Deltocephalinae | Vartini?        |  |                 | Charles Bartlett     |
| Thierola, Mali (13.6583, -7.2155)    |           | TB688A          | Hemiptera | Auchenorrhyncha | Membracoidea   | Cicadellidae     |                 |                 |  |                 | Charles Bartlett     |
| Thierola, Mali (13.6                 | 17-Oct-14 | 190 TB650A      | Hemiptera | Heteroptera     | Cimicoidea     | Nabidae          |                 |                 |  |                 | Carsten Morkel       |
| Thierola, Mali (13.6                 | 14-Oct-15 | 120 TB1035A     | Hemiptera | Heteroptera     | Coreoidea      | Rhopalidae       |                 |                 |  |                 | Carsten Morkel       |
| Thierola, Mali (13.6                 | 13-Aug-14 | 190 TB533B-HE-1 | Hemiptera | Heteroptera     | Coreoidea      | Stenocephalidae  |                 |                 |  | Dicranocephalus | Thomas Henry         |
| Thierola, Mali (13.6583, -7.2155)    |           | TB533A-HO-4     | Hemiptera | Heteroptera     | Corixoidea     | Corixidae        |                 |                 |  |                 | Charles Bartlett     |
| Thierola, Mali (13.6583, -7.2155)    |           | TB534A          | Hemiptera | Heteroptera     | Gerroidea      | Gerridae         | Trepobatinae    |                 |  |                 |                      |
| Thierola, Mali (13.6                 | 5-Nov-14  | 160 TB688A      | Hemiptera | Heteroptera     | Gerroidea      | Gerridae         |                 |                 |  |                 | Carsten Morkel       |
| Thierola, Mali (13.6                 | 19-Sep-14 | 120 TB627A      | Hemiptera | Heteroptera     | Gerroidea      | Veliidae         | Microveliinae   | Microveliini    |  | Microvelia      | sp.                  |
| Thierola, Mali (13.6                 | 13-Aug-14 | 160 TB532A-PH-1 | Hemiptera | Heteroptera     | Hydrometroidea | Hydrometridae    | Hydromerinae    |                 |  | Hydrometra      |                      |
| Thierola, Mali (13.6                 | 10-Aug-14 | 190 TB527A-HE-2 | Hemiptera | Heteroptera     | Lygaeoidea     | Berytidae        | Metacanthinae   | Metacanthini    |  | Metacanthus     | nitidus              |
| Thierola, Mali (13.6                 | 24-Aug-14 | 190 TB563A-HE-4 | Hemiptera | Heteroptera     | Lygaeoidea     | Berytidae        | Metacanthinae   |                 |  | Yemma           |                      |
| Thierola, Mali (13                   | 19-Sep-14 | 190 TB629A      | Hemiptera | Heteroptera     | Lygaeoidea     | Lygaeidae        | Geocorinae      |                 |  | Geocoris        | aff. erytrops        |
| Markabougou, Mali                    | 19-Jul-14 | 190 MB353A-HE-5 | Hemiptera | Heteroptera     | Lygaeoidea     | Lygaeidae        | Orsillinae      | Nysiini         |  | Nysius          |                      |
| Suigima, Mali (14.1                  | 24-Oct-14 | 190 SB488A-HE-3 | Hemiptera | Heteroptera     | Lygaeoidea     | Lygaeidae        | Rhyparochromina | Drymini         |  | Stilbocoris     |                      |
| Suigima, Mali (14.1                  | 24-Oct-14 | 120 SB486A-HE-2 | Hemiptera | Heteroptera     | Lygaeoidea     | Lygaeidae        |                 |                 |  |                 | Thomas Henry         |
| Thierola, Mali (13.6                 | 24-Aug-14 | 190 TB563A-HE-4 | Hemiptera | Heteroptera     | Lygaeoidea     | Oxycarenidae     |                 |                 |  | Camptotelus     |                      |
| Thierola, Mali (13.6                 | 13-Aug-14 | 160 TB532A-HE-1 | Hemiptera | Heteroptera     | Lygaeoidea     | Phypharochromida | Rhyparochromina | Rhyparochromini |  | Beosus          |                      |
| Thierola, Mali (13.6                 | 14-Oct-15 | 120 TB1035A     | Hemiptera | Heteroptera     | Lygaeoidea     | Rhyparochromida  | Rhyparochromina | Myodochini      |  | cf. Paromius    |                      |
| Thierola, Mali (13.6                 | 14-Oct-15 | 120 TB1035A     | Hemiptera | Heteroptera     | Lygaeoidea     | Rhyparochromida  | Rhyparochromina | Myodochini      |  | Paromius        | gracilis             |
| Suigima, Mali (14.1                  | 24-May-13 | 40 SB120A       | Hemiptera | Heteroptera     | Lygaeoidea     | Rhyparochromida  | Rhyparochromina | Ozophorini      |  | Ethaltomarus    | glabrosus (Scudder)  |
| Markabougou, M                       | 21-Jul-14 | 190 MB359A      | Hemiptera | Heteroptera     | Lygaeoidea     | Rhyparochromida  | Rhyparochromina | Stygnocorini    |  | cf. Lasiosomus  | sp.                  |
| Suigima, Mali (14.1                  | 19-Jul-14 | 120 SB327A-HE-2 | Hemiptera | Heteroptera     | Lygaeoidea     | Rhyparochromidae |                 |                 |  |                 | Thomas Henry         |
| Thierola, Mali (13                   | 19-Sep-14 | 190 TB629A      | Hemiptera | Heteroptera     | Miroidea       | Miridae          |                 |                 |  |                 | Andreas Krüger       |
| Thierola, Mali (13                   | 14-Aug-14 | 160 TB535B      | Hemiptera | Heteroptera     | Notonectoidea  | Notonectidae     | Anisopinae      |                 |  | Anisops         | spec.                |
| Markabougou, Mali (13.9128, -6.3425) |           | MB261A-HO-4     | Hemiptera | Heteroptera     | Notonectoidea  | Notonectidae     |                 |                 |  |                 | Charles Bartlett     |
| Suigima, Mali (14.1                  | 24-Oct-14 | 190 SB488A-HE-3 | Hemiptera | Heteroptera     | Pentatomoidea  | Cydniidae        | Cydniidae       | Geotomini       |  | Dallasiellus    | discrepans           |



|                                      |           |                  |              |                  |                 |                  |                 |                  |                       |                |                                   |
|--------------------------------------|-----------|------------------|--------------|------------------|-----------------|------------------|-----------------|------------------|-----------------------|----------------|-----------------------------------|
| Suigima, Mali (14.1                  | 24-Oct-14 | 120 SB486A-HE-1  | Hemiptera    | Heteroptera      | Pentatomoidea   | Cydnidae         | Cydninae        | Geotomini        | <i>Aethus</i>         |                | Thomas Henry                      |
| Suigima, Mali (14.1                  | 14-Oct-15 | 120 SB795A       | Hemiptera    | Heteroptera      | Pentatomoidea   | Cydnidae         |                 |                  |                       |                | Carsten Morkel                    |
| Suigima, Mali (14.1                  | 24-Oct-14 | 120 SB486A-HE-3  | Hemiptera    | Heteroptera      | Pentatomoidea   | Pentatomidae     | Pentatominae    | Antestini        | <i>Adria</i>          | <i>parvula</i> | Thomas Henry                      |
| Suigima, Mali (14.1                  | 14-Oct-15 | 120 SB795A       | Hemiptera    | Heteroptera      | Pentatomoidea   | Pentatomidae     |                 |                  |                       |                | Carsten Morkel                    |
| Thierola, Mali (13.6                 | 14-Jul-14 | 190 TB484A       | Hemiptera    | Heteroptera      | Pyrrhocoroidea  | Pyrrhocoridae    | Pyrrhocorinae   |                  | <i>Dysdercus</i>      | <i>sp.</i>     | Andreas Krüger                    |
| Suigima, Mali (14.1                  | 7-Jul-14  | 40 SB286A-HE-5   | Hemiptera    | Heteroptera      | Reduvoidea      | Reduviidae       |                 |                  |                       |                | Carsten Morkel                    |
| Thierola, Mali (13.6                 | 14-Sep-14 | 160 TB616A-HE-1  | Hemiptera    | Heteroptera      | Tingoidea       | Tingidae         | Tingidae        | Tingini          | <i>Cysteochila</i>    | <i>endeca</i>  | Thomas Henry                      |
| Suigima, Mali (14.1                  | 7-Jul-14  | 40 SB286A-HE-6   | Hemiptera    | Heteroptera      | Tingoidea       | Tingidae         | Tinginae        | Tingini          | <i>Dictyla</i>        |                | <a href="#">Tatina Novoselsky</a> |
| Thierola, Mali (13.6                 | 5-Nov-14  | 160 TB688A       | Hemiptera    | Heteroptera      | Tingoidea       | Tingidae         |                 |                  |                       |                | Carsten Morkel                    |
| Markabougou, Mali (13.9128, -6.3425) |           | MB416B           | Hemiptera    | Sternorrhyncha   | Aphidoidea      | Aphididae        |                 |                  |                       |                | Laura Verú                        |
| Thierola, Mali (13.6583, -7.2155)    |           | TB533A-HO-4      | Hemiptera    | Sternorrhyncha   | Psylloidea      |                  |                 |                  |                       |                | Charles Bartlett                  |
| Markabougou, Mali                    | 21-Aug-14 | 190 MB416B       | Hymenoptera  | Apocrita         | Apoidea         | Apidae           | Apinae          | Meliponini       | <i>Hypotrigona</i>    |                | Corey Smith/John                  |
| Thierola, Mali (13.6                 | 3-Aug-14  | TB512A-HY-2      | Hymenoptera  | Apocrita         | Apoidea         | Crabronidae      |                 |                  |                       |                | Elijah Talamas                    |
| Thierola, Mali (13.6                 | 24-Aug-14 | 190 TB563B-HY-2  | Hymenoptera  | Apocrita         | Apoidea         | Megachilidae     |                 |                  |                       |                | Elijah Talamas                    |
| Thierola, Mali (13.6                 | 20-Aug-13 | 40 TB392A-HY-2   | Hymenoptera  | Apocrita         | Apoidea         | Sphecidae        |                 |                  |                       |                | Elijah Talamas                    |
| Markabougou, Mali                    | 15-Oct-14 | MB446A-HY-1      | Hymenoptera  | Apocrita         | Apoidea         |                  |                 |                  |                       |                | Elijah Talamas                    |
| Thierola, Mali (13.6583, -7.2155)    |           | TB562B           | Hymenoptera  | Apocrita         | Chalcidoidea    | Chalcicidae      | Epitraninae     |                  | <i>Epitranus</i>      |                | Bob Copeland                      |
| Markabougou, Mali                    | 20-Aug-13 | 40 MB255A-HY-1   | Hymenoptera  | Apocrita         | Chalcidoidea    | Eulophidae       |                 |                  |                       |                | Jason Mottern                     |
| Thierola, Mali (13.6583, -7.2155)    |           | TB838A           | Hymenoptera  | Apocrita         | Chalcidoidea    | Eupelmidae       |                 |                  |                       |                | Elijah Talamas                    |
| Thierola, Mali (13.6                 | 24-Aug-14 | 190 TB563A-HY-3  | Hymenoptera  | Apocrita         | Chalcidoidea    | Eurytomidae      |                 |                  |                       |                | Elijah Talamas                    |
| Thierola, Mali (13.6                 | 24-Aug-14 | 190 TB563B-HY-3  | Hymenoptera  | Apocrita         | Chrysoidea      | Bethylidae       |                 |                  |                       |                | Elijah Talamas                    |
| Suigima, Mali (14.1666, -7.2332)     |           | SB053            | Hymenoptera  | Apocrita         | Chrysoidea      | Chrysididae      |                 |                  |                       |                | Elijah Talamas                    |
| Thierola, Mali (13.6                 | 22-Oct-15 | 120 TB1056B      | Hymenoptera  | Apocrita         | Chrysoidea      | Dryinidae        | Gonatopodinae   |                  | <i>Gonatopus</i>      |                | Laura Verú                        |
| Thierola, Mali (13.6583, -7.2155)    |           | TB608A           | Hymenoptera  | Apocrita         | Cynipoidea      | Figitidae        | Eucollinae      |                  | <i>Afrostilba</i>     |                | Massimo Olmi                      |
| Markabougou, Mali                    | 14-Aug-14 | 160 MB397A-HY-1  | Hymenoptera  | Apocrita         | Diaprioidea     | Diapriidae       | Diapriinae      | Psilini          | <i>Coptera</i>        |                | Elijah Talamas                    |
| Markabougou, Mali                    | 15-Aug-14 | 160 MB397A-HY-1  | Hymenoptera  | Apocrita         | Diaprioidea     | Diapriidae       |                 |                  |                       |                | Elijah Talamas                    |
| Markabougou, Mali                    | 19-Jul-14 | 160 MB352A-HY-4  | Hymenoptera  | Apocrita         | Ichneumonoidea  | Braconidae       | Cheloninae      |                  |                       |                | Elijah Talamas                    |
| Markabougou, Mali                    | 19-Jul-14 | 160 MB352A-HY-1  | Hymenoptera  | Apocrita         | Ichneumonoidea  | Braconidae       |                 |                  |                       |                | Elijah Talamas                    |
| Thierola, Mali (13.6583, -7.2155)    |           | TB608A           | Hymenoptera  | Apocrita         | Ichneumonoidea  | Ichneumonidae    | Tersilochinae   |                  |                       |                | Robert Kula                       |
| Thierola, Mali (13.6583, -7.2155)    |           | TB820A           | Hymenoptera  | Apocrita         | Platygastridae  | Scelionidae      | Scelioninae     | Gryonini         | <i>Gryon</i>          |                | Elijah Talamas                    |
| Thierola, Mali (13.6                 | 10-Aug-14 | 190 TB527A-HY-2  | Hymenoptera  | Apocrita         | Platygastridae  | Scelionidae      | Scelioninae     |                  | <i>Calliscelio</i>    |                | Elijah Talamas                    |
| Thierola, Mali (13.6                 | 24-Aug-14 | 190 TB563B-HY-3  | Hymenoptera  | Apocrita         | Platygastridae  | Scelionidae      | Scelioninae     |                  | <i>Dicroscelio</i>    |                | Elijah Talamas                    |
| Thierola, Mali (13.6                 | 24-Aug-14 | 190 TB563A-HY-2  | Hymenoptera  | Apocrita         | Platygastridae  | Scelionidae      | Scelioninae     |                  | <i>Fusicornia</i>     | <i>eos</i>     | Elijah Talamas                    |
| Thierola, Mali (13.6                 | 24-Aug-14 | 190 TB563B-HY-3  | Hymenoptera  | Apocrita         | Platygastridae  | Scelionidae      | Teleasinae      | Teleasini        | <i>Trimorus</i>       |                | Elijah Talamas                    |
| Markabougou, Mali                    | 22-Aug-13 | 40 MB261A-HY-1   | Hymenoptera  | Apocrita         | Vespoidea       | Formicidae       | Myrmicinae      | Creumatogastrini | <i>Creumatogaster</i> |                | Brendon Boudinot                  |
| Suigima, Mali (14.1                  | 2-Sep-14  | 190 SB419A-HY-1  | Hymenoptera  | Apocrita         | Vespoidea       | Formicidae       | Myrmicinae      | Creumatogastrini | <i>Tetramorium</i>    |                | Brendon Boudinot                  |
| Thierola, Mali (13.6                 | 3-Aug-14  | TB512A-HY-2      | Hymenoptera  | Apocrita         | Vespoidea       | Formicidae       | Myrmicinae      | Stenammini       | <i>Messor</i>         |                | Brendon Boudinot                  |
| Markabougou, Mali                    | 14-Aug-13 | 160 MB242A-HY-3  | Hymenoptera  | Apocrita         | Vespoidea       | Formicidae       | Ponerinae       | Ponerini         | <i>Anochetus</i>      |                | Brendon Boudinot                  |
| Thierola, Mali (13.6                 | 28-Oct-14 | 160 TB682A-HY-1  | Hymenoptera  | Apocrita         | Vespoidea       | Formicidae       | Ponerinae       | Ponerini         | <i>Brachyponera</i>   |                | Brendon Boudinot                  |
| Suigima, Mali (14.1                  | 14-Aug-13 | 160 SB173A-HY-1  | Hymenoptera  | Apocrita         | Vespoidea       | Formicidae       |                 |                  |                       |                | Brendon Boudinot                  |
| Thierola, Mali (13.6                 | 5-Aug-13  | 40 TB372A-HY-2   | Hymenoptera  | Apocrita         | Vespoidea       | Pompilidae       |                 |                  |                       |                |                                   |
| Thierola, Mali (13.6                 | 3-Aug-14  | TB512A-HY-2      | Hymenoptera  | Apocrita         | Vespoidea       | Rhopalosomatidae |                 |                  |                       |                | Elijah Talamas                    |
| Thierola, Mali (13.6                 | 2-Nov-15  | 120 TB1062A      | Neuroptera   | Hemerobiiformia  | Chrysopoidea    | Chrysopidae      | Chrysopinae     | Chrysopini       | <i>Brinckochrysa</i>  |                | Stephen J Brooks                  |
| Thierola, Mali (13.6                 | 7-Jul-14  | 160 TB462B       | Neuroptera   | Hemerobiiformia  | Chrysopoidea    | Chrysopidae      | Chrysopinae     | Chrysopini       | <i>Chrysoperla</i>    | <i>congrua</i> | Stephen J Brooks                  |
| Suigima, Mali (14.1666, -7.2332)     |           | SB113A           | Neuroptera   | Hemerobiiformia  | Mantispoidea    | Mantispidae      |                 |                  |                       |                | Laura Verú                        |
| Thierola, Mali (13.6                 | 22-Jul-13 | 120 TB361A-OR-1  | Orthoptera   | Caelifera        | Acridoidea      | Acrididae        | Gomphocerinae   |                  |                       |                | Hojun Song                        |
| Thierola, Mali (13.6                 | 22-Jul-13 | 120 TB361A-OR-1  | Orthoptera   | Caelifera        | Acridoidea      | Acrididae        | Oedipodinae     |                  |                       |                | Hojun Song                        |
| Thierola, Mali (13.6                 | 5-Aug-13  | 40 TB372A-OR-2   | Orthoptera   | Caelifera        | Acridoidea      | Acrididae        |                 |                  |                       |                | Hojun Song                        |
| Thierola, Mali (13.6                 | 23-Jul-13 | 120 TB364A-OR-1  | Orthoptera   | Caelifera        | Pyrgomorphae    | Pyrgomorphidae   | Pyrgomorphae    | Atractomorphi    | <i>Atractomorpha</i>  |                | Ricardo Marino-Pé                 |
| Thierola, Mali (13.6                 | 19-Jul-13 | 40 TB351A-OR-1   | Orthoptera   | Caelifera        | Pyrgomorphae    | Pyrgomorphidae   | Pyrgomorphae    | Pyrgomorphi      | <i>Pyrgomorpha</i>    |                | Ricardo Marino-Pé                 |
| Thierola, Mali (13.6                 | 13-Oct-15 | 190 TB1033A-OR-2 | Orthoptera   | Caelifera        | Tetrigoidea     | Tetrigidae       | Tetriginae      | Tetrigini        |                       |                | Hojun Song                        |
| Thierola, Mali (13.6                 | 28-Oct-14 | 190 TB683A-OR-2  | Orthoptera   | Ensifera         | Grylloidea      | Gryllidae        | Oecanthinae     | Oecanthini       | <i>Oecanthus</i>      |                | Song Lab                          |
| Thierola, Mali (13.6                 | 13-Oct-15 | 190 TB1033A-OR-1 | Orthoptera   | Ensifera         | Tettigonoidea   | Tettigoniidae    | Conocephalinae  |                  |                       |                | Derek A. Woller &                 |
| Thierola, Mali (13.6                 | 12-Oct-14 | 120 TB633A-OR-1  | Orthoptera   | Ensifera         | Tettigonoidea   | Tettigoniidae    | Phaneropterinae |                  |                       |                | Derek A. Woller &                 |
| Markabougou, Mali                    | 7-Nov-14  | 160 MB493A-OR-1  | Orthoptera   | Ensifera         | Tettigonoidea   | Trigonididae     | Trigonidiinae   | Trigonidiini     |                       |                | Hojun Song                        |
| Thierola, Mali (13.6583, -7.2155)    |           | TB349I           | Neuroptera   | Myrmeleontiformi | Myrmeleontoidea | Myrmeleontidae   |                 |                  |                       |                | Laura Verú                        |
| Thierola, Mali (13.6583, -7.2155)    |           | TB502A           | Thysanoptera |                  |                 |                  |                 |                  |                       |                | Laura Verú                        |
| Thierola, Mali (13.6583, -7.2155)    |           |                  |              |                  |                 | Culicidae        |                 |                  |                       |                |                                   |

Table S2. Taxonomical, ecological, and natural history of selected taxa.

Table S2: Identification, size, ecological services, and natural history of selected taxa

| Taxon                                         | Order       | Family        | Taxonomist        | Body Length | Mass (mg) | Ecological Service                                                 | Taxa affected                                                                                                                                           | Diet:gen/spec             | Habitat                                                                                                                | HabitatLarvae                                                                                                                                | Aestivation              | Generatime | Migration (genus level)                |
|-----------------------------------------------|-------------|---------------|-------------------|-------------|-----------|--------------------------------------------------------------------|---------------------------------------------------------------------------------------------------------------------------------------------------------|---------------------------|------------------------------------------------------------------------------------------------------------------------|----------------------------------------------------------------------------------------------------------------------------------------------|--------------------------|------------|----------------------------------------|
| <i>Dysdercus</i> sp. Audinet-Serville         | Hemiptera   | Pyrrhocoridae | Thomas Henry      | 13.8        | 43.52     | Agricultural Pest                                                  | Cotton and many other crops                                                                                                                             | seeds malvales generalist | Lush vegetation                                                                                                        | Baobab/Cotton/malvales, even millet, sorghum                                                                                                 |                          |            | Windborne LDM in W Africa: Ivory coast |
| <i>Cystoecchia endeca</i> Drake               | Hemiptera   | Tingidae      | Thomas Henry      | 3.23        | 0.57      | Agricultural Pest                                                  | Pest of tamarind, rice                                                                                                                                  | generalist                |                                                                                                                        |                                                                                                                                              |                          |            |                                        |
| <i>Metacanthus nitidus</i> Štusá              | Hemiptera   | Berytidae     | Carsten Morkel    | 5.7         | 0.83      |                                                                    | Feed on nettle: <i>Fleuria aestuans</i> may also be a predator of crop pests                                                                            | Generalist                | steppe and semi-desert                                                                                                 |                                                                                                                                              |                          |            | Suspected LDM                          |
| <i>Nephotettix modulator</i> Melichar         | Hemiptera   | Cicadellidae  | Charles Bartlett  | 4.56        | 2.98      | Agricultural Pest                                                  | Voracious herbivore on crops and a vector of viral diseases                                                                                             | Generalist                | Rice, millet, grasses                                                                                                  | Rice, millet, grasses                                                                                                                        |                          |            |                                        |
| <i>Anopheles coluzzii</i> Coetzee & Wilkerson | Diptera     | Culicidae     | Adama Dao         | 1.2         | 1.5       | Human Disease Vector                                               | Primary vector of malaria and other human diseases                                                                                                      | human specific            | Standing water, peridomestic                                                                                           | aquatic                                                                                                                                      | Yes: Dec-May             | 10-14 d    | Windbone LDM in W Africa               |
| <i>Zolotarevskyella rhytidera</i> (Chaudoir)  | Coleoptera  | Carabidae     | Lourdes Chamorr   | 2.93        | 0.58      | Predator of agricultural pests?                                    | Predator agricultural pest species                                                                                                                      | Generalist                |                                                                                                                        |                                                                                                                                              |                          |            |                                        |
| <i>Paederus sabeus</i> Erichson               | Coleoptera  | Staphylinidae | Howard Frank      | 7.5         | 5.3       | Agent of dermatitis in people and a predator of agricultural pests | Medically important and predatory on crop pests                                                                                                         | generalist predator       | Wet habitats: marshes, edges of lakes, streams, rice fields                                                            | Wet habitats: marshes, edges of lakes, streams, rice fields                                                                                  |                          |            |                                        |
| <i>Paederus fuscipes</i> Curtis               | Coleoptera  | Staphylinidae | Howard Frank      | 6.3         | 3.32      | Agent of dermatitis in people and a predator of agricultural pests | Medically important and predatory on crop pests. Human infestations coincided with the local rice harvest                                               | generalist predator       | Wet habitats: marsh, edges of lakes, streams, rice fields                                                              | Wet habitats: marshes, edges of lakes, streams, rice fields                                                                                  |                          | 45 d @28C  |                                        |
| <i>Chaetocnema coletta</i> Bechyn             | Coleoptera  | Chrysomelidae | Maurizio Biondi   | 2.18        | 1.15      | Agricultural Pest                                                  | Genus is a pest of corn, sweet potato, barley, wheat, sorghum, bean, alfalfa, rye, sugarbeet. Feeds voraciously on foliage; vector plant pathogen: RYMV | generalist?               | Wet vegetation and montane grasslands, absent from desert areas                                                        | moist environments                                                                                                                           |                          |            |                                        |
| <i>Berosus</i> sp. Leach                      | Coleoptera  | Hydrophilidae | Warren Steiner    | 3.05        | 1.7       | Predators of mosquito larvae                                       | Predator of mosquito larvae                                                                                                                             | Generalist                | Aquatic: ponds, puddles, streams                                                                                       | Aquatic: ponds, puddles, streams                                                                                                             | into soil enter domrancy |            |                                        |
| <i>Microchelonus</i> sp. (Szépligeti)         | Hymenoptera | Brachonidae   | Elijah Talamas    | 3.16        | 1.02      | Parasitoid of agricultural pests?                                  | Unknown host, typically lepidopterans as Tortricidae, Gelechiidae and others                                                                            | Specialist                | Lepidopteran egg/caterpillar                                                                                           | host body                                                                                                                                    |                          |            |                                        |
| <i>Hypotrigona</i> sp. Cockerell              | Hymenoptera | Megachillidae | Corey Smith, John | 3.19        | 2.74      | Pollinator -high importance                                        | Frequent crop visitors in E Africa, collect nectar and pollen from almost all crop plant species.                                                       | Generalist                | well distributed in the tropics in various habitats. In East Africa: grasslands, natural forests, wetlands, farmlands, | Social bees nest in soils and wood. Uganda: commonly nest on walls of old buildings and in dry wood in forests. Sometimes in termite mounds. |                          |            |                                        |
| <i>Hydrovatus</i> sp. Motschulsky             | Coleoptera  | Dytiscidae    | Saverio Rocchi    | 2.12        | 1.69      | Predators of mosquito larvae                                       | Predator of mosquito larvae                                                                                                                             | Predator                  | Aquatic: ponds, puddles, streams                                                                                       | Aquatic: ponds, puddles, streams                                                                                                             |                          |            |                                        |
